# Supplementary material
Source: ML conference proceedings conference paper supplement (https://proceedings.neurips.cc/paper_files/paper/2017/hash/f337d999d9ad116a7b4f3d409fcc6480-Abstract.html)
Supplement: Supplementary file [file f337d999d9ad116a7b4f3d409fcc6480-Supplemental.zip]

---

# Supplement

## Differential Private Empirical Risk Minimization Revisited: Faster and More General

---

### 1 Experiments

In this section, we validate our methods using Coverttype dataset<sup>1</sup> and logistic regression. This dataset contains 581012 samples with 54 features. We use 200000 samples for training. We compare our **DP-SVRG** algorithm with the **DP-GD** method in [7] for logistic regression with  $L_2$ -norm regularization.

$$F^r(w, D) = \frac{1}{n} \sum_{i=1}^n \log(1 + \exp(1 + y_i w^T x_i)) + \frac{\lambda}{2} \|w\|^2,$$

where  $\lambda$  is set to be  $10^{-2}$ .

We also compare our **DP-SVRG++** algorithm with the **DP-GD** method in [7] for logistic regression,

$$F^r(w, D) = \frac{1}{n} \sum_{i=1}^n \log(1 + \exp(1 + y_i w^T x_i))$$

We evaluate the optimality gap  $\mathbb{E}[F^r(w^{\text{private}}, D)] - F^r(w^*, D)$  and the running time for  $\epsilon = \{0.2, 0.5, 1\}$  and  $\delta = 0.001$ .

From the figure, it is clear that our method outperform the previous results in both cases.

### 2 Details and proofs

#### 2.1 Using Advance Composition Theorem to Guarantee $(\epsilon, \delta)$ -differential private

As we can see that there are constrains on  $\epsilon$  in Theorem 4.1 and Theorem 4.3. The constrains come from Theorem 3.1 (see the proof below). For general  $\epsilon$ , we can just amplify a factor of  $O(\ln(T/\delta))$  on the  $\sigma$ . However, in this case, we will amplify a factor of  $O(\log(Tm/\delta))$  (neglecting other terms) in (5) and (7) in Theorem 4.2 and 4.4; the guarantee of DP is by advanced composition theorem and privacy amplification via sampling [3]. Below we will show this. Consider the  $i$ -th query:

$$M_i = \nabla f(x_{t-1}^s, z_{i_t}^s) - \nabla f(\tilde{x}, z_{i_t}^s) + \frac{1}{n} \sum_{i=1}^n \nabla f(\tilde{x}, z_i) + \mathcal{N}(0, \sigma^2 I_p),$$

where  $i_t^s$  is the uniform sampling. There are  $T$ -compositions of these queries. By advanced composition theorem, we know that in order to guarantee the  $(\epsilon, \delta)$ -differential private, we need  $(c \frac{\epsilon}{\sqrt{T \log(1/\delta)}}, T/2\delta)$ -differential private in each  $M_i$  for some constant  $c$ . Now consider  $M_i$  on the

---

<sup>1</sup><https://archive.ics.uci.edu/ml/datasets/coverttype>

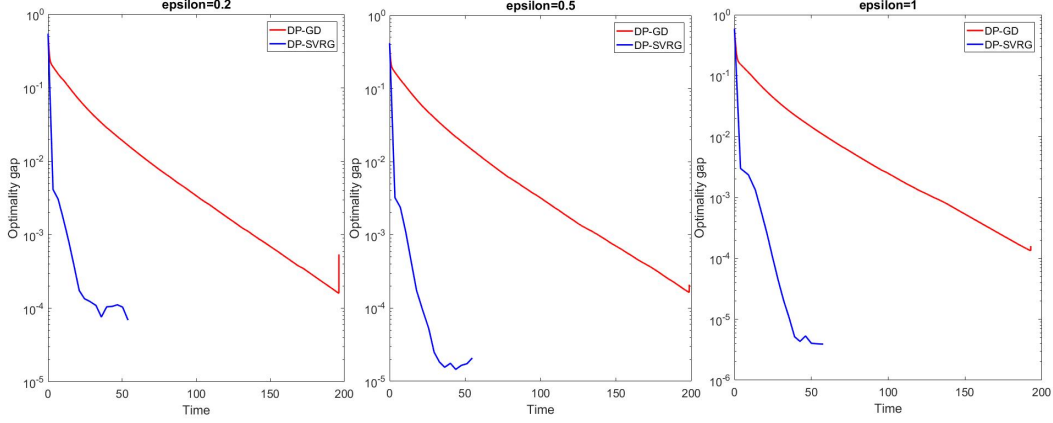

Figure 1: Comparison of DP-SVRG and DP-GD for Logistic regression with different  $\epsilon$  and  $L_2$ -regularization. We set  $T = 15, m = 5000$  and use SVRG-BB for step size update in DP-SVRG,  $T = 1500$  in DP-GD.

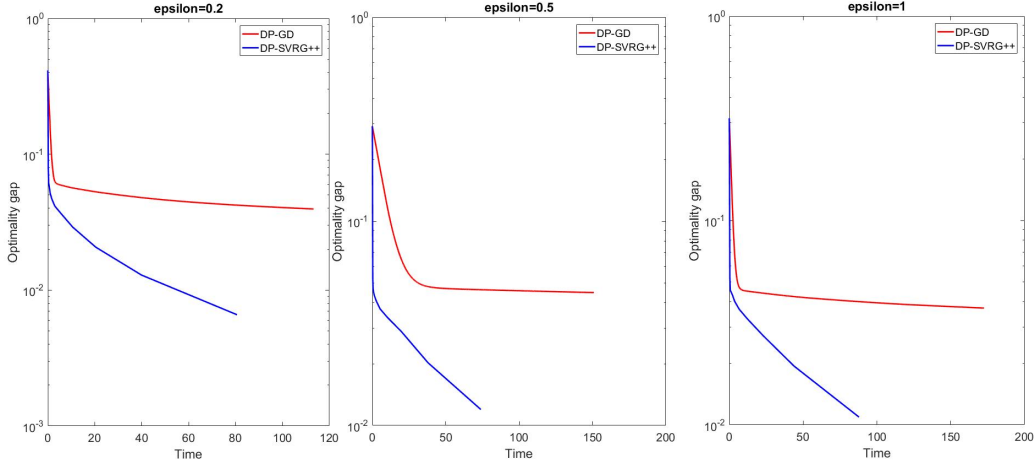

Figure 2: Comparison of DP-SVRG++ and DP-GD for Logistic regression with different  $\epsilon$ . We set  $T = 15, m = 10, \eta = 0.01$  in DP-SVRG++ and  $T = 1000, \eta = 0.1$  in DP-GD.

whole dataset (*i.e.*, with no random sample).

$$\tilde{M}_i = \sum_{i=1}^n \nabla f(x_{i-1}^s, z_i) - \sum_{i=1}^n \nabla f(\tilde{x}, z_i) + \frac{1}{n} \sum_{i=1}^n \nabla f(\tilde{x}, z_i) + \mathcal{N}(0, \sigma^2 I_p).$$

From the above, we can see that the  $L_2$ -sensitive of  $\tilde{M}_i$  is  $\Delta \leq 2G + \frac{G}{n} \leq 3G$ . Thus if  $\sigma^2 \geq c_1 \frac{G^2 \log(1/\delta')}{\epsilon'^2}$  for some  $c_1$ ,  $\tilde{M}_i$  will be  $(\epsilon', \delta')$ -differential private. This implies that the query  $M_i$  will be  $(2\frac{1}{n}\epsilon', \delta')$ -differential private, which comes from the following lemma (see Theorem 2.1 and Lemma 2.2 in [3]).

**Lemma 2.1.** If an algorithm  $\mathcal{A}$  is  $\epsilon'$ -differentially private, then for any  $n$ -element dataset  $D$ , executing  $\mathcal{A}$  on uniformly random  $\gamma n$  entries ensures  $2\gamma\epsilon'$ -differential private.

Let  $2\frac{1}{n}\epsilon' = c\frac{\epsilon}{\sqrt{T\log(1/\delta)}}$  and  $\delta' = T/2\delta$ , that is  $\epsilon' = c'\frac{n\epsilon}{\sqrt{T\log(1/\delta)}}$  and

$$\sigma^2 \geq c_2 \frac{GT\log(T/\delta)\log(1/\delta)}{\epsilon^2 n^2}.$$

We can guarantee that  $T$  composition of  $M_i$  queries is  $(\epsilon, \delta)$ -differential private.

## 2.2 Proof of Theorem 4.1 and 4.3

*Proof.* W.l.o.g, we assume  $G = 1$ , i.e.,  $\|\nabla f\| \leq 1$  (otherwise we can rescale  $f$ ). The Proof of Theorem 4.1 and Theorem 4.3 are the same instead of the iteration number (or number of queries). Let the difference data of  $D, D'$  be the  $n$ -th data. Now, consider the  $i$ -th query:

$$M_i = \nabla f(x_{t-1}^s, z_{i_t}^s) - \nabla f(\tilde{x}, z_{i_t}^s) + \frac{1}{n} \sum_{i=1}^n \nabla f(\tilde{x}, z_i) + u_t^s, u_t^s \sim \mathcal{N}(0, \sigma^2 I_p),$$

where  $i_t^s \in [n]$  is a uniform sample. This query can be thought as the composition of two queries:

$$M_{i,1} = \nabla f(x_{t-1}^s, z_{i_t}^s) - \nabla f(\tilde{x}, z_{i_t}^s) + \mathcal{N}(0, \sigma_1^2 I_p) \quad (1)$$

and

$$M_{i,2} = \nabla F(\tilde{x}, D) + \mathcal{N}(0, \sigma_2^2 I_p) = \frac{1}{n} \sum_{i=1}^n \nabla f(\tilde{x}, z_i) + \mathcal{N}(0, \sigma_2^2 I_p) \quad (2)$$

for some  $\sigma_1, \sigma_2$ . By **Theorem 2.1** in [1] we have  $\alpha_{M_i}(\lambda) \leq \alpha_{M_{i,1}}(\lambda) + \alpha_{M_{i,2}}(\lambda)$ . Now we bound  $\alpha_{M_{i,1}}(\lambda)$  and  $\alpha_{M_{i,2}}(\lambda)$ .

For  $\alpha_{M_{i,1}}$ , we can use **Lemma 3** in [1] directly, where  $q = \frac{1}{n}$ ,  $f(\cdot) = \nabla f(x_{t-1}^s, \cdot) - \nabla f(\tilde{x}, \cdot)$ . For some constant  $c_1$  and any integer  $\lambda \leq \sigma_1^2 \ln(n/\sigma_1)$ , we have

$$\alpha_{M_{i,1}}(\lambda) \leq c_1 \frac{\lambda^2}{n^2 \sigma_1^2} + O\left(\frac{\lambda^3}{n^3 \sigma_1^3}\right). \quad (3)$$

For  $\alpha_{M_{i,2}}(\lambda)$ , we use the relationship between moment account and Rényi divergence. By Definition 2.1 in [4] we have:

$$\alpha_{M_{i,2}}(\lambda) = \lambda D_{\lambda+1}(P||Q), \quad (4)$$

where  $P = \nabla F(\tilde{x}, D) + \mathcal{N}(0, \sigma_2^2 I_p) = \mathcal{N}(\nabla F(\tilde{x}, D), \sigma_2^2)$  and  $Q = \nabla F(\tilde{x}, D') + \mathcal{N}(0, \sigma_2^2 I_p) = \mathcal{N}(\nabla F(\tilde{x}, D'), \sigma_2^2)$ . By Lemma 2.5 in [4], we have for some  $c_2$ :

$$\lambda D_{\lambda+1}(P||Q) = \frac{\lambda(\lambda+1)\|\nabla F(\tilde{x}, D) - \nabla F(\tilde{x}, D')\|^2}{2\sigma^2} \leq \frac{2\lambda(\lambda+1)}{n^2 \sigma_2^2} \leq \frac{c_1 \lambda^2}{n^2 \sigma_2^2}. \quad (5)$$

Combining (3), (4) and (5), we have

$$\alpha_{M_i}(\lambda) \leq c_1 \frac{\lambda^2}{n^2 \sigma_2^2} + c_2 \frac{\lambda^2}{n^2 \sigma_1^2} + O\left(\frac{\lambda^3}{n^3 \sigma_1^3}\right). \quad (6)$$

The rest is similar to the proof of Theorem 3.1.

After  $T$  iterations, we have for some  $c_1, c_2$ ,

$$\alpha_M \leq \sum_{i=1}^T \alpha_{M_i} \leq c_1 \frac{\lambda^2}{n^2 \sigma_2^2} + c_2 \frac{\lambda^2}{n^2 \sigma_1^2}. \quad (7)$$

To be  $(\epsilon, \delta)$ -differential private, by Theorem 2.2 in [1], it suffices that

$$c_1 \frac{T\lambda^2}{n^2 \sigma_2^2} + c_2 \frac{T\lambda^2}{n^2 \sigma_1^2} \leq \frac{\lambda\epsilon}{2}$$

and

$$\exp\left(\frac{-\lambda\epsilon}{2}\right) \leq \delta.$$

In addition we need

$$\lambda \leq \sigma_1^2 \ln(n/\sigma_1). \quad (8)$$

It can be verified that when  $\epsilon \leq c_3 \frac{T}{n^2}$  for some constant  $c_3$ , we have

$$\sigma_1 = c_4 \frac{\sqrt{T \log(1/\delta)}}{n\epsilon} \quad (9)$$

and

$$\sigma_2 = c_5 \frac{\sqrt{T \log(1/\delta)}}{n\epsilon}. \quad (10)$$

For some constant  $c_4, c_5$ , all the conditions can be satisfied. Since the sum of two Gaussian distributions is still a Gaussian distribution, and  $M_i = M_{i,1} + M_{i,2}$ , we have  $\sigma = c \frac{\sqrt{T \log(1/\delta)}}{n\epsilon}$  for some  $c$ . Thus, T-fold of the queries.

$$M_i = \nabla f(x_{t-1}^s, z_{i_t}^s) - \nabla f(\tilde{x}, z_{i_t}^s) + \frac{1}{n} \sum_{i=1}^n \nabla f(\tilde{x}, z_i) + \mathcal{N}(0, \sigma^2 I_p)$$

will guarantee  $(\epsilon, \delta)$ -differential private when  $\epsilon \leq c_3 \frac{T}{n^2}$ .

For Theorem 4.1  $T = Tm$  while for Theorem 4.3  $T = 2^{T+1}m$ .  $\square$

### 2.3 Proof of Theorem 5.3 and Theorem 6.1

*Proof.* The proof is similar to the above.

$$M_i = \nabla F(\tilde{x}, D) + \mathcal{N}(0, \sigma^2 I_p) = \frac{1}{n} \sum_{i=1}^n \nabla f(\tilde{x}, z_i) + \mathcal{N}(0, \sigma^2 I_p). \quad (11)$$

By (3) and (4), we have

$$\alpha_{M_i}(\lambda) \leq \frac{2\lambda(\lambda + 1)}{n^2 \sigma^2}. \quad (12)$$

Thus, after  $T$ -iterations, we have for some  $c$

$$\alpha_M \leq \sum_{i=1}^T \alpha_{M_i} \leq c \frac{T\lambda^2}{n^2 \sigma^2}. \quad (13)$$

Taking  $\sigma = c_1 \frac{\sqrt{T \log(1/\delta)}}{n\epsilon}$  for some constant  $c_1$ , we can guarantee that

$$c \frac{T\lambda^2}{n^2 \sigma^2} \leq \frac{\lambda\epsilon}{2}$$

and

$$\exp\left(\frac{-\lambda\epsilon}{2}\right) \leq \delta,$$

which means  $(\epsilon, \delta)$ -differential privacy due to Theorem 2.2 in [1].  $\square$

### 2.4 Proof of Theorem 4.2

*Proof.* Let  $g_t^s = \frac{1}{\eta}(x_{t-1}^s - \text{prox}_{\eta r}(x_{t-1}^s - \eta v_t^s))$ . Then we have  $x_t^s = x_{t-1}^s - \eta g_t^s$ . Thus

$$\|x_t^s - x_*\|^2 = \|x_{t-1}^s - \eta g_t^s - x_*\|^2 = \|x_{t-1}^s - x_*\|^2 - 2\eta \langle g_t^s, x_{t-1}^s - x_* \rangle + \eta^2 \|g_t^s\|^2. \quad (14)$$

By Lemma 3 in [6], we have the following inequality

$$\begin{aligned} -\langle g_t^s, x_{t-1}^s - x_* \rangle + \frac{\eta}{2} \|g_t^s\|^2 &\leq F^r(x_*) - F^r(x_t^s) - \frac{\mu_F}{2} \|x_{t-1}^s - x_*\|^2 - \frac{\mu_r}{2} \|x_t^s - x_*\|^2 \\ &\quad - \langle v_t^s - \nabla F(x_{t-1}^s), x_t^s - x_* \rangle. \end{aligned} \quad (15)$$

Plugging (15) into (14), we have

$$\|x_t^s - x_*\|^2 \leq \|x_{t-1}^s - x_*\|^2 - 2\eta[F^r(x_t^s) - F^r(x_*)] - 2\eta \langle v_t^s - \nabla F(x_{t-1}^s), x_t^s - x_* \rangle. \quad (16)$$

Next we bound  $-2\eta\langle v_t^s - \nabla F(x_{t-1}^s), x_t^s - x^* \rangle$ . Denote  $\hat{x}_t^s = \text{prox}_{\eta r}(x_{t-1}^s - \eta \nabla F(x_{t-1}^s))$ .

$$\begin{aligned} & -2\eta\langle v_t^s - \nabla F(x_{t-1}^s), x_t^s - x^* \rangle = \\ & -2\eta\langle v_t^s - \nabla F(x_{t-1}^s), x_t^s - \hat{x}_t^s \rangle - 2\eta\langle v_t^s - \nabla F(x_{t-1}^s), \hat{x}_t^s - x_* \rangle \end{aligned} \quad (17)$$

$$\leq 2\eta\|v_t^s - \nabla F(x_{t-1}^s)\| \|x_t^s - \hat{x}_t^s\| - 2\eta\langle v_t^s - \nabla F(x_{t-1}^s), \hat{x}_t^s - x_* \rangle \quad (18)$$

$$\leq 2\eta\|v_t^s - \nabla F(x_{t-1}^s)\| \|x_{t-1}^s - \eta v_t^s - (x_{t-1}^s - \nabla F(x_{t-1}^s))\| - 2\eta\langle v_t^s - \nabla F(x_{t-1}^s), \hat{x}_t^s - x_* \rangle \quad (19)$$

$$\leq 2\eta^2\|v_t^s - \nabla F(x_{t-1}^s)\|^2 - 2\eta\langle v_t^s - \nabla F(x_{t-1}^s), \hat{x}_t^s - x_* \rangle \quad (20)$$

The first inequality is due to the following lemma,

**Lemma 2.2.** Let  $r$  be a closed convex function on  $\mathbb{R}^p$ . Then for any  $x, y \in \text{dom}(R)$

$$\|\text{prox}_r(x) - \text{prox}_r(y)\| \leq \|x - y\|.$$

We can easily get  $\mathbb{E}_{u_t^s, i_t^s}(v_t^s - \nabla F(x_{t-1}^s)) = 0$  since  $u_t^s$  is independent with  $v_{t-1}^s$ . Also by Lemma 1 in [6] and  $\mathbb{E}[\|a + b\|^2] \leq 2\mathbb{E}\|a\|^2 + 2\mathbb{E}\|b\|^2$ , we have

$$\mathbb{E}_{i_t^s, u_t^s}\|v_t^s - \nabla F(x_{t-1}^s)\|^2 \leq 8L[F^r(x_{t-1}^s) - F^r(x_*) + F^r(\tilde{x}) - F^r(x_*)] + 2\sigma^2 p. \quad (21)$$

Plugging (20) into (16) and taking the expectation with  $i_t^s, u_t^s$ , we have

$$\begin{aligned} \mathbb{E}\|x_t^s - x_*\|^2 & \leq \|x_{t-1}^s - x_*\|^2 - 2\eta[\mathbb{E}(F^r(x_t^s) - F^r(x_*))] + \\ & 16\eta^2 L[F^r(x_{t-1}^s) - F^r(x_*) + F^r(\tilde{x}) - F^r(x_*)] + 4\eta^2 \sigma^2 p. \end{aligned} \quad (22)$$

Summing over  $t = 1, 2, \dots, m$  and taking the expectation, we have

$$\mathbb{E}[\|x_m^s - x_*\|^2] + 2\eta(1 - 8\eta L) \sum_{t=1}^m [\mathbb{E}(F^r(x_t^s)) - F^r(x_*)] \quad (23)$$

$$\leq \|\tilde{x} - x_*\|^2 + 16L\eta^2(m+1)[F^r(\tilde{x}) - F^r(x_*)] + 4m\eta^2 \sigma^2 p. \quad (24)$$

Since  $F^r$  is  $\mu$  strongly convex, we have  $\|\tilde{x} - x_*\|^2 \leq \frac{2}{\mu}(F^r(\tilde{x}) - F^r(x_*))$ . Dividing  $2m\eta(1 - 8L\eta)$  from both sides, we get

$$\mathbb{E}[F^r(\tilde{x}^s)] - F^r(x_*) \leq \left(\frac{1}{\eta(1 - 8\eta L)\mu m} + \frac{8L\eta(m+1)}{m(1 - 8L\eta)}\right)(\mathbb{E}[F^r(\tilde{x}_{s-1})] - F^r(x_*)) + \frac{2\eta}{1 - 8L\eta} \sigma^2 p. \quad (25)$$

Thus we can choose  $\eta = \Theta(\frac{1}{L}) < \frac{1}{12L}$  and  $m = \Theta(\frac{L}{\mu})$  to make

$$A = \frac{1}{\eta(1 - 8\eta L)\mu m} + \frac{8L\eta(m+1)}{m(1 - 8L\eta)} < \frac{1}{2}$$

and  $\frac{2\eta}{1 - 8L\eta} < \frac{1}{2L}$ . By (25) and summing over  $s = 1, 2, \dots, T$  we can get

$$\mathbb{E}[F^r(\tilde{x}^T)] - F^r(x_*) \quad (26)$$

$$\leq A^T[F^r(x_0) - F^r(x_*)] + \frac{\sigma^2 p}{L} \quad (27)$$

$$= A^s[F^r(x_0) - F^r(x_*)] + O\left(\frac{pG^2 T m \ln(1/\delta)}{n^2 \epsilon^2 L}\right) \quad (28)$$

$$= A^T[F^r(x_0) - F^r(x_*)] + O\left(\frac{pG^2 T \ln(1/\delta)}{n^2 \epsilon^2 \mu}\right). \quad (29)$$

Thus if we take  $T$  such that  $A^T[F^r(x_0) - F^r(x_*)] = O\left(\frac{pG^2 \ln(1/\delta)}{n^2 \epsilon^2 \mu}\right)$ , i.e.,

$$T = O\left(\log\left(\frac{n^2 \epsilon^2 \mu}{pG^2 \ln(1/\delta)}\right)\right).$$

We have

$$\mathbb{E}[F^r(\tilde{x}^T)] - F^r(x_*) \leq O\left(\frac{pG^2 \ln(n\epsilon\mu/pG) \ln(1/\delta)}{n^2 \epsilon^2 \mu}\right).$$

where the big-O notation omitted the other  $\ln$  term.  $\square$

## 2.5 Proof of Theorem 4.4

*Proof.*

$$\mathbb{E}_{i_t^s, u_t^s}[F^r(x_t^s) - F^r(x_*)] = \mathbb{E}_{i_t^s, u_t^s}[F(x_t^s) - F(x_*) + r(x_t^s) - r(x_*)] \quad (30)$$

$$\leq \mathbb{E}_{i_t^s, u_t^s}[F(x_{t-1}^s) + \langle \nabla F(x_{t-1}^s), x_t^s - x_{t-1}^s \rangle + \frac{L}{2} \|x_t^s - x_{t-1}^s\|^2 - F(x_*) + r(x_t^s) - r(x_*)] \quad (31)$$

$$\leq \mathbb{E}_{i_t^s, u_t^s}[\langle \nabla F(x_{t-1}^s), x_{t-1}^s - x_* \rangle] + \langle \nabla F(x_{t-1}^s), x_t^s - x_{t-1}^s \rangle + \frac{L}{2} \|x_t^s - x_{t-1}^s\|^2 + r(x_t^s) - r(x_*)] \quad (32)$$

$$= \mathbb{E}_{i_t^s, u_t^s}[\langle v_t^s, x_{t-1}^s - x_* \rangle] + \langle \nabla F(x_{t-1}^s), x_t^s - x_{t-1}^s \rangle + \frac{L}{2} \|x_t^s - x_{t-1}^s\|^2 + r(x_t^s) - r(x_*)]. \quad (33)$$

The last equality is due to the fact that  $\mathbb{E}_{i_t^s, u_t^s}[v_t^s] = \nabla F(x_{t-1}^s)$ . Since we have ([2])

$$\langle v_t^s, x_{t-1}^s - x_* \rangle + r(x_t^s) - r(x_*) \leq \langle v_t^s, x_{t-1}^s - x_t^s \rangle + \frac{\|x_{t-1}^s - x_*\|^2}{2\eta} - \frac{\|x_t^s - x_*\|^2}{2\eta} - \frac{\|x_t^s - x_{t-1}^s\|^2}{2\eta}. \quad (34)$$

Plugging (34) into (33), we have

$$\begin{aligned} LHS \leq & \mathbb{E}_{i_t^s, u_t^s}[\langle v_t^s - \nabla F(x_{t-1}^s), x_{t-1}^s - x_t^s \rangle - \frac{1-\eta L}{2\eta} \|x_t^s - x_{t-1}^s\|^2 \\ & + \frac{\|x_{t-1}^s - x_*\|^2 - \|x_t^s - x_*\|^2}{2\eta}] \end{aligned} \quad (35)$$

$$\leq \mathbb{E}_{i_t^s, u_t^s} \frac{\eta}{2(1-\eta L)} \|v_t^s - \nabla F(x_{t-1}^s)\|^2 + \frac{\|x_{t-1}^s - x_*\|^2 - \mathbb{E}_{i_t^s, u_t^s}[\|x_t^s - x_*\|^2]}{2\eta} \quad (36)$$

$$\begin{aligned} \leq & \frac{4\eta L}{1-\eta L} [F^r(x_{t-1}^s) - F^r(x_*) + F^r(\tilde{x}_{s-1}) - F^r(x_*)] + \frac{\eta}{1-\eta L} p\sigma^2 \\ & + \frac{\|x_{t-1}^s - x_*\|^2 - \mathbb{E}_{i_t^s, u_t^s}[\|x_t^s - x_*\|^2]}{2\eta}. \end{aligned} \quad (37)$$

Choosing  $\eta = \frac{1}{13L}$ , summing over  $t = 1, \dots, m_s$ , dividing  $m_s$ , and taking expectation, we have

$$\begin{aligned} \mathbb{E}[\frac{1}{m_s} \sum_{t=1}^{m_s} F^r(x_t^s) - F^r(x_*)] \leq & \frac{1}{3} \mathbb{E}[\frac{1}{m_s} \sum_{t=0}^{m_s-1} [F^r(x_t^s) - F^r(x_*) + F^r(\tilde{x}_{s-1}) - F^r(x_*)] + \\ & \frac{\|x_0^s - x_*\|^2 - \mathbb{E}[\|x_{m_s}^s - x_*\|^2]}{2\eta m_s} + \frac{1}{12L} \sigma^2 p]. \end{aligned} \quad (38)$$

By the definitions of  $x_0^{s+1}$  and  $\tilde{x}_s$ , we have

$$\begin{aligned} 2\mathbb{E}[F^r(\tilde{x}_s) - F^r(x_*)] \leq & \mathbb{E}[\frac{F^r(x_0^s) - F^r(x_*) - (F^r(x_0^{s+1}) - F^r(x_*))}{m_s} + \\ & F^r(\tilde{x}_{s-1}) - F^r(x_*) + \frac{\|x_0^s - x_*\|^2 - \|x_0^{s+1} - x_*\|^2}{2\eta/3m_s}] + \frac{1}{4L} \sigma^2 p, \end{aligned} \quad (39)$$

which implies that

$$2(\mathbb{E}[F^r(\tilde{x}_s) - F^r(x_*) + \frac{\|x_0^{s+1} - x_*\|^2}{4\eta/3m_s} + \frac{F^r(x_0^{s+1}) - F^r(x_*)}{2m_s}]) \quad (40)$$

$$\leq \mathbb{E}[F^r(\tilde{x}_{s-1}) - F^r(x_*) + \frac{\|x_0^s - x_*\|^2}{4\eta/3m_{s-1}} + \frac{F^r(x_0^s) - F^r(x_*)}{2m_{s-1}}] + \frac{1}{4L} \sigma^2 p. \quad (41)$$

Summing over  $s = 1, \dots, T$ , we get

$$\mathbb{E}[F^r(\tilde{x}_T) - F^r(x_*)] \quad (42)$$

$$\leq \frac{F^r(\tilde{x}_0) - F^r(x_*)}{2^{T-1}} + \frac{\|\tilde{x}_0 - x_*\|^2}{2^T 4\eta/3m} + \frac{1}{4L} \sigma^2 p. \quad (43)$$

Thus, if we take  $m = \Theta(L)$  to make  $A = 2F^r(\tilde{x}_0) - F^r(x_*) + \frac{\|\tilde{x}_0 - x_*\|^2}{4\eta/3m}$  independent of  $T, n, p, \sigma, L$ , plug  $\sigma$  into (43) we have

$$\mathbb{E}[F^r(\tilde{x}_T)] - F^r(x_*) \leq \frac{A}{2^T} + O\left(\frac{G^2 p 2^T m \ln 2/\delta}{n^2 \epsilon^2 L}\right) = \frac{A}{2^T} + O\left(\frac{G^2 p 2^T \ln(1/\delta)}{n^2 \epsilon^2}\right). \quad (44)$$

Let  $T = O(\log(\frac{n\epsilon}{G\sqrt{p}\sqrt{1/\delta}}))$ . We have

$$\mathbb{E}[F^r(\tilde{x}_s)] - F^r(x_*) \leq O\left(\frac{G\sqrt{p \ln(1/\delta)}}{n\epsilon}\right).$$

The gradient complexity is  $O(2^s m + Tn) = O(\frac{nL\epsilon}{G\sqrt{p}} + n \log(\frac{n\epsilon}{G\sqrt{p}}))$ .  $\square$

## 2.6 Proof of lemma 5.1

*Proof.* If  $v = 0$ , this is true. If not, we will show that  $\frac{\|v\|_2}{\|C\|_2} \leq \|v\|_C$ . This is equivalent to show that  $v \notin \frac{\|v\|_2}{\|C\|_2} C$ . Take any  $y \in C$ . Since  $\|\frac{\|v\|_2}{\|C\|_2} y\|_2 = \frac{\|v\|_2}{\|C\|_2} \|y\|_2$ , we know that  $\|y\|_2 < \|C\|_2$ . Thus  $\|\frac{\|v\|_2}{\|C\|_2} y\|_2 < \|v\|_2$ . We have  $v \notin \frac{\|v\|_2}{\|C\|_2} C$ .  $\square$

## 2.7 Proof of Theorem 5.4

*Proof.* We use  $\|\cdot\|$  and  $\|\cdot\|_*$  instead of  $\|\cdot\|_C$  and  $\|\cdot\|_{C^*}$ . Also, w.l.o.g we assume that  $\|C\|_2 = 1$  (for the general case, just replace  $L$  by  $L\|C\|_2^2$ ). Since  $b_{k+1}$  is independent of  $x_{k+1}$ , we have for any  $u$

$$\begin{aligned} \mathbb{E}_{b_{k+1}}[\langle \alpha_{k+1} \nabla F(x_{k+1}), z_k - u \rangle] &= \mathbb{E}_{b_{k+1}}[\langle \alpha_{k+1} (\nabla F(x_{k+1}) + b_{k+1}), z_k - u \rangle] \\ &= \mathbb{E}_{b_{k+1}}[\langle \alpha_{k+1} (\nabla F(x_{k+1}) + b_{k+1}), z_k - z_{k+1} \rangle] + \mathbb{E}_{b_{k+1}}[\langle \alpha_{k+1} (\nabla F(x_{k+1}) + b_{k+1}), z_{k+1} - u \rangle]. \end{aligned} \quad (45)$$

Since  $z_{k+1} = \arg \min_{z \in C} \{\mathcal{B}_w(z, z_k) + \alpha_{k+1} \langle \nabla F(x_{k+1}) + b_{k+1}, z - z_k \rangle\}$ , which implies that  $\langle \nabla \mathcal{B}_w(z_{k+1}, z_k) + \alpha_{k+1} (\nabla F(x_{k+1}) + b_{k+1}), u - z_{k+1} \rangle \geq 0$  for every  $u \in C$ . So we can get

$$\mathbb{E}_{b_{k+1}}[\langle \alpha_{k+1} (\nabla F(x_{k+1}) + b_{k+1}), z_{k+1} - u \rangle] \quad (46)$$

$$\leq \mathbb{E}_{b_{k+1}}[\langle -\nabla \mathcal{B}_w(z_{k+1}, z_k), z_{k+1} - u \rangle] = \mathbb{E}_{b_{k+1}}[\mathcal{B}_w(u, z_k) - \mathcal{B}_w(u, z_{k+1}) - \mathcal{B}_w(z_{k+1}, z_k)], \quad (47)$$

where the equality is due to the triangle equality of Bregman divergence. Since  $w$  is 1-strong convex with respect to  $\|\cdot\|$ , we have  $-\mathcal{B}_w(z_{k+1}, z_k) \leq -\frac{1}{2}\|z_{k+1} - z_k\|^2$ . Plugging this into (44), we have

$$\mathbb{E}_{b_{k+1}}[\langle \alpha_{k+1} \nabla F(x_{k+1}), z_k - u \rangle] \quad (48)$$

$$\leq \mathbb{E}_{b_{k+1}}[\langle \alpha_{k+1} (\nabla F(x_{k+1}) + b_{k+1}), z_k - z_{k+1} \rangle - \frac{1}{2}\|z_{k+1} - z_k\|^2] + \mathcal{B}_w(u, z_k) - \mathbb{E}_{b_{k+1}}[\mathcal{B}_w(u, z_{k+1})] \quad (49)$$

$$\leq \mathbb{E}_{b_{k+1}}[\langle \alpha_{k+1} \nabla F(x_{k+1}), z_k - z_{k+1} \rangle - \frac{1}{4}\|z_{k+1} - z_k\|^2] + \alpha_{k+1}^2 \mathbb{E}_{b_{k+1}}[\|b_{k+1}\|_*^2] \quad (50)$$

$$+ \mathcal{B}_w(u, z_k) - \mathbb{E}_{b_{k+1}}[\mathcal{B}_w(u, z_{k+1})]. \quad (51)$$

The last inequality is due to Cauchy-Schwartz Inequality. Thus we have  $\langle \alpha_{k+1} b_{k+1}, z_k - z_{k+1} \rangle \leq \alpha_{k+1}^2 \|b_{k+1}\|_*^2 + \frac{1}{4}\|z_k - z_{k+1}\|^2$ . Now we want to bound  $\mathbb{E}_{b_{k+1}}[\langle \alpha_{k+1} \nabla F(x_{k+1}), z_k - z_{k+1} \rangle -$

$\frac{1}{4} \|z_{k+1} - z_k\|^2]$ . Define  $v = r_k z_{k+1} + (1 - r_k) y_k \in \mathcal{C}$  so that  $x_{k+1} - v = r_k(z_k - z_{k+1})$ . We have

$$\begin{aligned} & \langle \alpha_{k+1} \nabla F(x_{k+1}), z_k - z_{k+1} \rangle - \frac{1}{4} \|z_{k+1} - z_k\|^2 = \langle \frac{\alpha_{k+1}}{r_k} \nabla F(x_{k+1}), x_{k+1} - v \rangle \\ & - \frac{1}{4r_k^2} \|x_{k+1} - v\|^2 \end{aligned} \quad (52)$$

$$= 2\alpha_{k+1}^2 L(\langle F(x_{k+1}), x_{k+1} - v \rangle - \frac{L}{2} \|x_{k+1} - v\|^2) \quad (53)$$

$$\leq 2\alpha_{k+1}^2 L(-\min_{y \in \mathcal{C}} \{ \frac{L}{2} \|y - x_{k+1}\|^2 + \langle F(x_{k+1}), y - x_{k+1} \rangle \}) \quad (54)$$

$$= 2\alpha_{k+1}^2 L(-\{ \frac{L}{2} \|y_{k+1} - x_{k+1}\|^2 + \langle F(x_{k+1}), y_{k+1} - x_{k+1} \rangle \}) \quad (55)$$

$$\leq 2\alpha_{k+1}^2 L(F(x_{k+1}) - F(y_{k+1})). \quad (56)$$

The last inequality is due to the fact that  $F$  is  $L\|\mathcal{C}\|_2^2$ -smooth (note that  $\|\mathcal{C}\|_2 = 1$ ) in  $\|\cdot\|$  norm and the definition of  $y_{k+1}$ . Thus, we get the following

$$\begin{aligned} & \mathbb{E}_{b_{k+1}}[\langle \alpha_{k+1} \nabla F(x_{k+1}), z_k - u \rangle] = \mathbb{E}_{b_{k+1}}[\langle \alpha_{k+1} (\nabla F(x_{k+1}) + b_{k+1}), z_k - u \rangle] \\ & \leq 2\alpha_{k+1}^2 L(F(x_{k+1}) - F(y_{k+1})) + \mathcal{B}_w(u, z_k) - \mathbb{E}_{b_{k+1}}[\mathcal{B}_w(u, z_{k+1})] + \alpha_{k+1}^2 \mathbb{E}_{b_{k+1}} \|b_{k+1}\|_*^2. \end{aligned} \quad (57)$$

By using the Concentration of Gaussian Width, Lemma 3.3 in [5] shows that  $\mathbb{E}_{b_{k+1}} \|b_{k+1}\|_*^2 = \sigma^2 O(G_{\mathcal{C}}^2 + \|\mathcal{C}\|_2^2)$ , where  $G_{\mathcal{C}}$  is the Gaussian Width of  $\mathcal{C}$ . From this, we have

$$\begin{aligned} & E_{b_{k+1}}[\alpha_{k+1}(F(x_{k+1}) - F(u))] \leq \mathbb{E}_{b_{k+1}}[\langle \alpha_{k+1} \nabla F(x_{k+1}), x_{k+1} - u \rangle] \\ & = \mathbb{E}_{b_{k+1}}[\langle \alpha_{k+1} \nabla F(x_{k+1}), x_{k+1} - z_k \rangle] + \mathbb{E}_{b_{k+1}}[\langle \alpha_{k+1} \nabla F(x_{k+1}), z_k - u \rangle] \\ & \leq \frac{\alpha_{k+1}(1 - r_k)}{r_k} \langle \nabla F(x_{k+1}), y_k - x_{k+1} \rangle + \mathbb{E}_{b_{k+1}}[\langle \alpha_{k+1} \nabla F(x_{k+1}), z_k - u \rangle] \\ & \leq \frac{\alpha_{k+1}(1 - r_k)}{r_k} (F(y_k) - F(x_{k+1})) + \mathbb{E}_{b_{k+1}}[\langle \alpha_{k+1} \nabla F(x_{k+1}), z_k - u \rangle] \\ & \leq (2\alpha_{k+1}^2 L - \alpha_{k+1})(F(y_k) - F(x_{k+1})) + 2\alpha_{k+1}^2 L(F(x_{k+1}) - F(y_{k+1})) \\ & + \mathcal{B}_w(u, z_k) - \mathbb{E}_{b_{k+1}}[\mathcal{B}_w(u, z_{k+1})] + \alpha_{k+1}^2 \mathbb{E}_{b_{k+1}} \|b_{k+1}\|_*^2. \end{aligned}$$

Thus we obtain

$$2\alpha_{k+1}^2 L F(y_{k+1}) - (2\alpha_{k+1}^2 L - \alpha_{k+1}) F(y_k) + \mathbb{E}(\mathcal{B}_w(u, z_{k+1}) - \mathcal{B}_w(u, z_k)) \quad (58)$$

$$\leq \alpha_{k+1} F(u) + \alpha_{k+1}^2 \sigma^2 O(G_{\mathcal{C}}^2 + \|\mathcal{C}\|_2^2). \quad (59)$$

By the definition of  $\alpha_{k+1}$ , we have  $2\alpha_k^2 L = 2\alpha_{k+1}^2 L - \alpha_{k+1} + \frac{1}{8L}$ . Summing over  $k = 0 \dots, T-1$  and setting  $u = x_*$ , by the definition of  $\alpha_k$  we have  $\sum_{k=1}^T \alpha_k^2 = O(T^3)$ . After taking the expectation we get

$$2\alpha_T^2 L \mathbb{E}[F(y_T)] + \frac{1}{8L} \mathbb{E}[\sum_{k=1}^{T-1} F(y_k)] + \mathbb{E}[\mathcal{B}_w(x_*, z_{T-1})] - \mathcal{B}_w(x_*, z_0) \quad (60)$$

$$\leq \sum_{k=1}^T \alpha_k F(x_*) + O(T^3 \sigma^2 (G_{\mathcal{C}}^2 + \|\mathcal{C}\|_2^2) / L^2). \quad (61)$$

Plugging  $\alpha_k = \frac{k+1}{4L}$  into (59), (60) and dividing both sides by a factor of  $2\alpha_T^2 L$ , by the fact that  $\mathcal{B}_w \geq 0$  we finally get

$$\mathbb{E}[F(y_T)] - F[x_*] \leq \frac{8L\mathcal{B}_w(x_*, x_0)}{(T+1)^2} + O(T\sigma^2 (G_{\mathcal{C}}^2 + \|\mathcal{C}\|_2^2) / L). \quad (62)$$

Since  $\sigma^2 = O(\frac{G^2 T \ln(1/\delta)}{n^2 \epsilon^2})$ , if choose

$$T^2 = O(\frac{L\sqrt{\mathcal{B}_w(x_*, x_0)}n\epsilon}{G\sqrt{\ln(1/\delta)}\sqrt{G_{\mathcal{C}}^2 + \|\mathcal{C}\|_2^2}}), \quad (63)$$



we have the bound

$$\mathbb{E}[F(y_T)] - F(x_*) \leq O\left(\frac{\sqrt{\mathcal{B}_w(x_*, x_0)}\sqrt{G_C^2 + \|\mathcal{C}\|_2^2}G\sqrt{\ln(1/\delta)}}{n\epsilon}\right).$$

□

## 2.8 Proof of Theorem 6.2

*Proof.* First of all, we have

$$\mathbb{E}_{z_k}[F(x_{k+1}) - F(x_k)] \leq \mathbb{E}_{z_k}\left[-\frac{1}{L}\langle \nabla F(x_k), \nabla F(x_k) + z_k \rangle + \frac{1}{2L}\|\nabla F(x_k) + z_k\|^2\right] \quad (64)$$

$$= -\frac{1}{2L}\|\nabla F(x_k)\|^2 + \frac{1}{2L}\mathbb{E}_{z_k}\|z_k\|^2 \quad (65)$$

$$\leq -\frac{\mu}{L}(F(x_k) - F^*) + \frac{p\sigma^2}{2L}. \quad (66)$$

Re-arranging the terms, we get

$$\mathbb{E}[F(x_{k+1})] - F^* \leq (1 - \frac{\mu}{L})(F(x_k) - F^*) + \frac{p\sigma^2}{2L}.$$

Summing over  $k = 0, \dots, T$  and taking expectation, we obtain

$$\mathbb{E}[F(x_T)] - F^* \leq (1 - \frac{\mu}{L})^T(F(x_0) - F^*) + \frac{Tp\sigma^2}{2L}. \quad (67)$$

Thus, when  $T = O(\log(\frac{n^2\epsilon^2}{pG^2\log(1/\delta)}))$

$$\mathbb{E}[F(x_T)] - F^* \leq O\left(\frac{\log^2(n)pG^2\log(1/\delta)}{n^2\epsilon^2}\right), \quad (68)$$

where the big- $O$  notation neglects other  $\log, L, \mu$  terms. □

## 2.9 Proof of Theorem 6.3

*Proof.* The proof is similar to that of Theorem 6.2. Let  $F^* = \min_{x \in \mathbb{R}^p} F(x, D)$ . We have

$$\mathbb{E}_{z_k} F(x_{k+1}) - F(x_k) \leq \mathbb{E}_{z_k}\left[-\frac{1}{L}\langle \nabla F(x_k), \nabla F(x_k) + z_k \rangle\right] + \frac{1}{2L}\mathbb{E}_{z_k}\|\nabla F(x_k) + z_k\|^2 \quad (69)$$

$$\leq -\frac{1}{2L}\|\nabla F(x_k)\|^2 + \frac{p\sigma^2}{2L}. \quad (70)$$

From this, we get

$$\frac{1}{2L}\|\nabla F(x_k)\|^2 \leq F(x_k) - \mathbb{E}_{z_k} F(x_{k+1}) + \frac{p\sigma^2}{2L}. \quad (71)$$

Thus,  $\mathbb{E}_{m, \{z_i\}}[\|\nabla F(x_m)\|^2] = \frac{1}{T} \sum_{i=0}^{T-1} \mathbb{E}_{\{z_i\}}[\|\nabla F(x_i)\|^2]$ . By (71), summing over  $k = 0, \dots, T-1$ , we obtain

$$\mathbb{E}_{m, \{z_i\}}[\|\nabla F(x_m)\|^2] \leq \frac{2L(F(x_0) - \mathbb{E}[F(x_T)])}{T} + p\sigma^2 \quad (72)$$

$$\leq \frac{2L(F(x_0) - F^*)}{T} + O\left(\frac{pG^2\log(1/\delta)T}{n^2\epsilon^2}\right). \quad (73)$$

Thus, if choose  $T = O(\frac{\sqrt{Ln\epsilon}}{\sqrt{p\log(1/\delta)}G})$ , we have  $\mathbb{E}[\|\nabla F(x_m)\|^2] \leq O(\frac{\sqrt{LG}\sqrt{p\log(1/\delta)}}{n\epsilon})$ . □

## References

- [1] M. Abadi, A. Chu, I. Goodfellow, H. B. McMahan, I. Mironov, K. Talwar, and L. Zhang. Deep learning with differential privacy. In *Proceedings of the 2016 ACM SIGSAC Conference on Computer and Communications Security*, pages 308–318. ACM, 2016.

- [2] Z. Allen-Zhu and Y. Yuan. Improved SVRG for Non-Strongly-Convex or Sum-of-Non-Convex Objectives. In *Proceedings of the 33rd International Conference on Machine Learning, ICML '16*, 2016.
- [3] R. Bassily, A. Smith, and A. Thakurta. Private empirical risk minimization: Efficient algorithms and tight error bounds. In *Foundations of Computer Science (FOCS), 2014 IEEE 55th Annual Symposium on*, pages 464–473. IEEE, 2014.
- [4] M. Bun and T. Steinke. Concentrated differential privacy: Simplifications, extensions, and lower bounds. In *Theory of Cryptography Conference*, pages 635–658. Springer, 2016.
- [5] K. Talwar, A. Thakurta, and L. Zhang. Private empirical risk minimization beyond the worst case: The effect of the constraint set geometry. *arXiv preprint arXiv:1411.5417*, 2014.
- [6] L. Xiao and T. Zhang. A proximal stochastic gradient method with progressive variance reduction. *SIAM Journal on Optimization*, 24(4):2057–2075, 2014.
- [7] J. Zhang, K. Zheng, W. Mou, and L. Wang. Efficient private ERM for smooth objectives. In *Proceedings of the Twenty-Sixth International Joint Conference on Artificial Intelligence, IJCAI 2017, Melbourne, Australia, August 19-25, 2017*, pages 3922–3928, 2017.
